# Supplementary material for: Selective inhibition of protein secretion by abrogating receptor–coat interactions during ER export
Source: PubMed Central journal article supplement (PMC9351455; doi:10.1073/pnas.2202080119), 2022-07-28
Supplement: pnas.2202080119.sapp.pdf [file pnas.2202080119.sapp.pdf]

## **Supplementary Information for** Selective inhibition of protein secretion by abrogating receptor-coat interactions during ER export.

Natalia Gomez-Navarro, Julija Maldutyte, Kristina Poljak, Sew-Yeu Peak-Chew, Jonathon Orme, Brittany J. Bisnett, Caitlin H. Lamb, Michael Boyce, Davide Gianni, Elizabeth A. Miller

Elizabeth A. Miller  
Email: emiller@mrc-lmb.cam.ac.uk

### **This PDF file includes:**

Figures S1 to S8  
Table S1

### **Other supplementary materials for this manuscript include the following:**

Datasets S1 to S3

## Figure S1

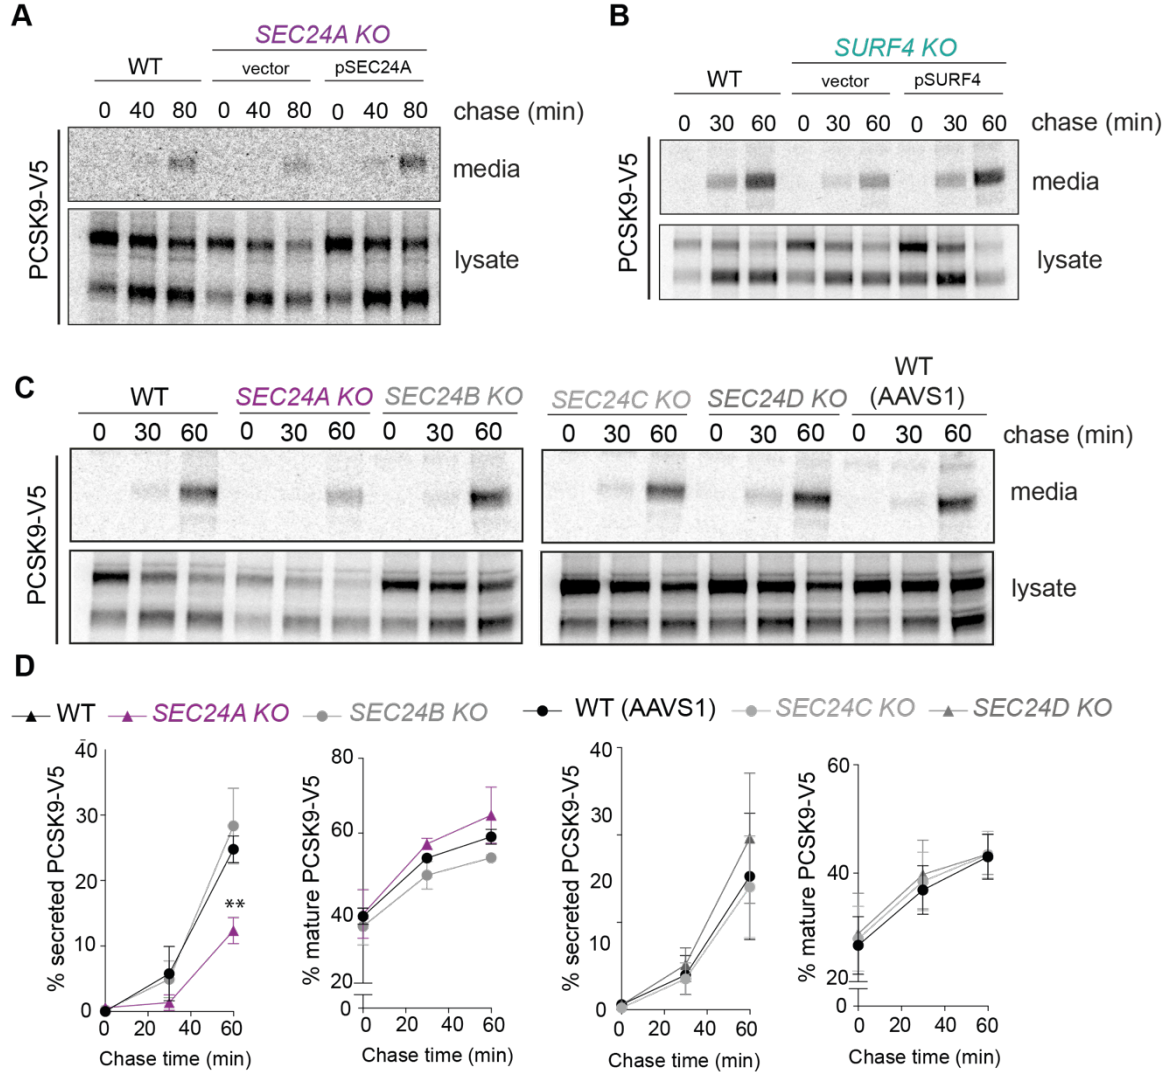

**Figure S1: Rescue of PCSK9 secretion defects in *SEC24A* KO and *SURF4* KO cells. (A)** PCSK9-V5 secretion was examined by pulse-chase in WT, and KO cells complemented by transient transfection with the relevant rescue plasmids. PCSK9 was immunoprecipitated with  $\alpha$ -V5 from lysates and the conditioned media at the indicated times and detected by SDS-PAGE and autoradiography as described in Figure 1. **(B)** Quantification of PCSK9 secretion shown in A as described in Figure 1. **(C)** PCSK9-V5 secretion was monitored in *SEC24* KO lines indicated, along with the corresponding wild-type lines (HEK TReX293 for *SEC24B* KO and AAVS1 for *SEC24C* and *SEC24D* KO), as described in Figure 1. **(D)** Quantification of PCSK9 secretion shown in C as described in Figure 1.

**Figure S2**

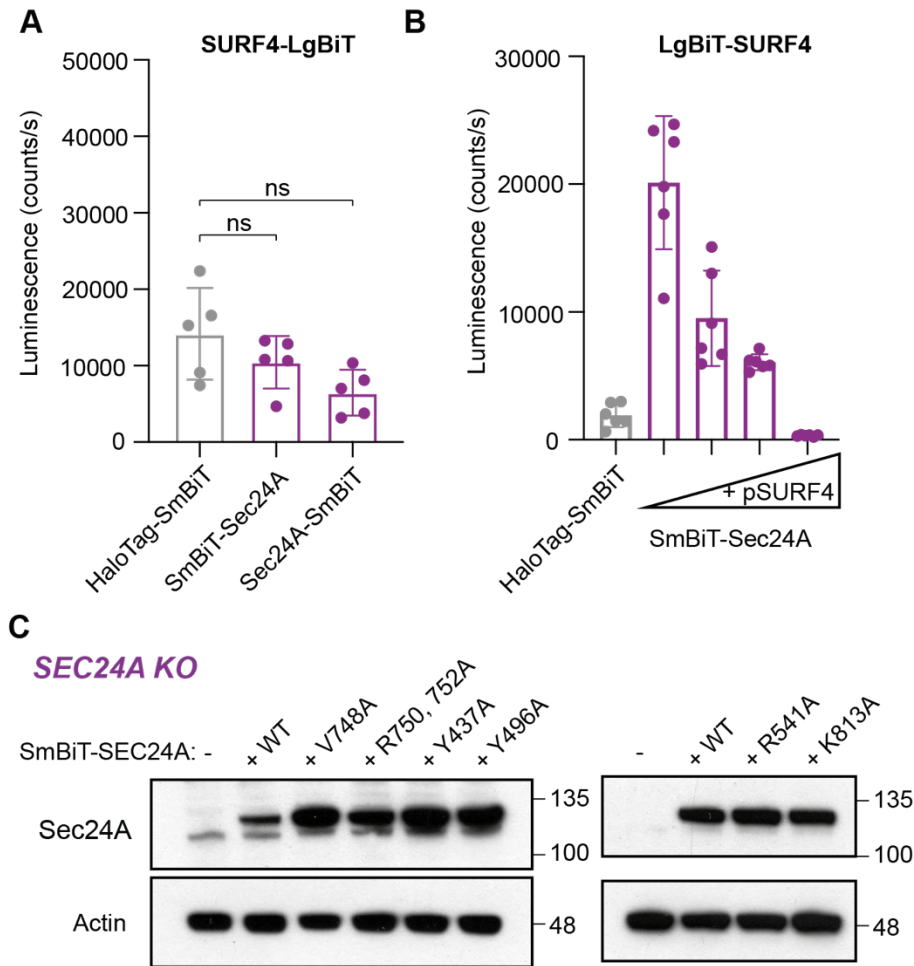

**Figure S2: Establishment of the SEC24A-SURF4 NanoBiT assay and stability of SEC24A mutants.** (A) Control experiments for the NanoBiT assay showing non-optimal tagging orientations and the corresponding negative control in *SEC24A SURF4* double KO cells. The graph shows mean luminescence  $\pm$  SD ( $n = 6$ ); statistical test was a one-way ANOVA with Dunnett's correction for multiple comparisons. (B) Specificity of the assay was tested by expressing increasing amounts of untagged fusion partners. Plots show mean  $\pm$  SD,  $n=6$ . (C) Stability of B-site (left-hand panel) and C-site (right-hand panel) SEC24A mutants was analysed by immunoblotting cell lysates prepared from equal numbers of cells with  $\alpha$ -SEC24A antibodies.

**Figure S3**

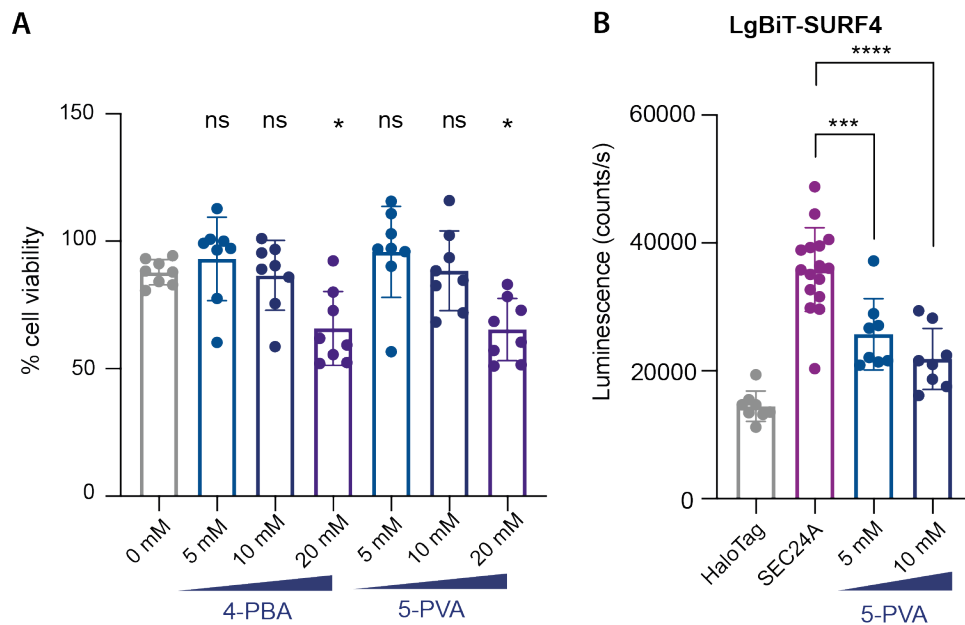

**Figure S3: Effects of 4-PBA on cell viability. (A)** Dose-dependent effects of 4-PBA on cell viability. Cells were grown on plates overnight and then treated for 4h with the indicated concentrations of 4-PBA. Cell viability was measured using the MTS Cell Proliferation Colorimetric Assay Kit. Values are given as mean  $\pm$  SD,  $n=8$ . **(B)** Luminescence that reports on the interaction between SURF4 and SEC24A was measured in the presence of the indicated concentrations of 5-PVA. The NanoBiT reporters were induced overnight and cells were treated with 5-PVA for 4h. The graph shows the mean luminescence  $\pm$  SD ( $n = 8$ ;  $n= 16$  for 0 mM 4-PBA); statistical test was a one-way ANOVA with Dunnett's correction for multiple comparisons, \*  $p<0.05$ , \*\*\*\*  $p<0.0001$ .

Figure S4

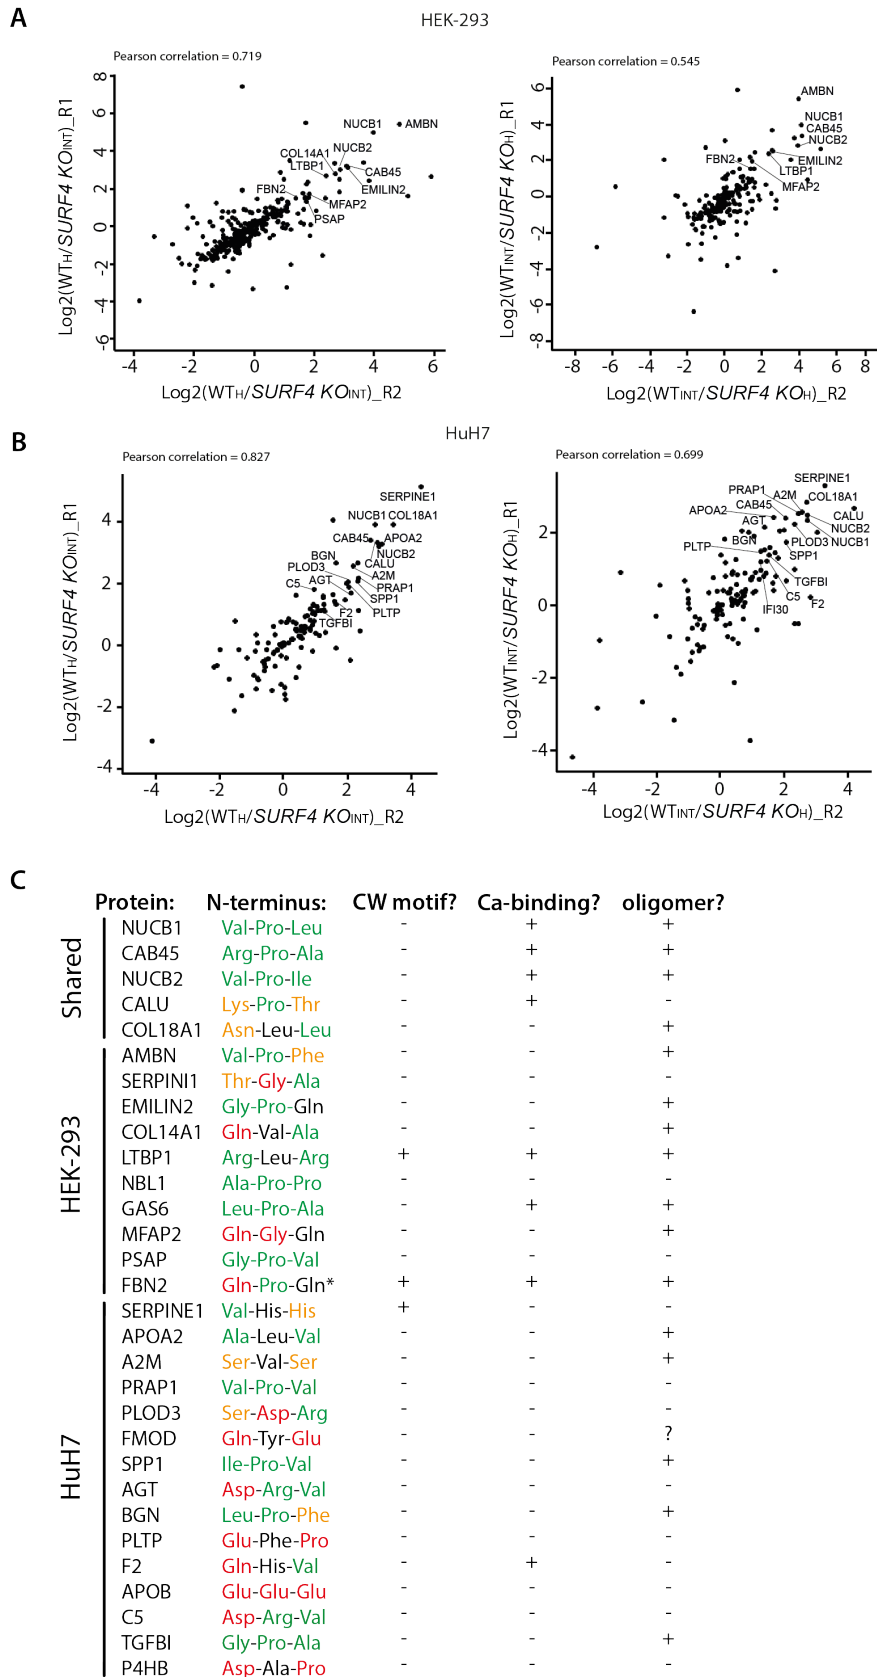

**Figure S4: ER-ESCAPE motif sequence of the top SURF4 cargo clients identified in the proteomic quantification. (A), (B)** Scatter plots of Log2 SILAC ratios of the two replicates within each label-switch pair in HEK-293 or HuH7 cell media samples. Correlation is indicated by Pearson's correlation coefficient. **(C)** Top SURF4 client hits identified by proteomic analysis and annotated for (i) N-terminal sequence color coded based on relative contribution of each amino acid position to the strength of the ER-ESCAPE motif as described in (Yin et al., 2018) (green = very good, yellow = good, black = neutral, and red = bad); (ii) presence of CW motif; (iii) presence of a Ca-binding domain or annotation as a Ca-binding protein; (iv) propensity to oligomerize.

**Figure S5**

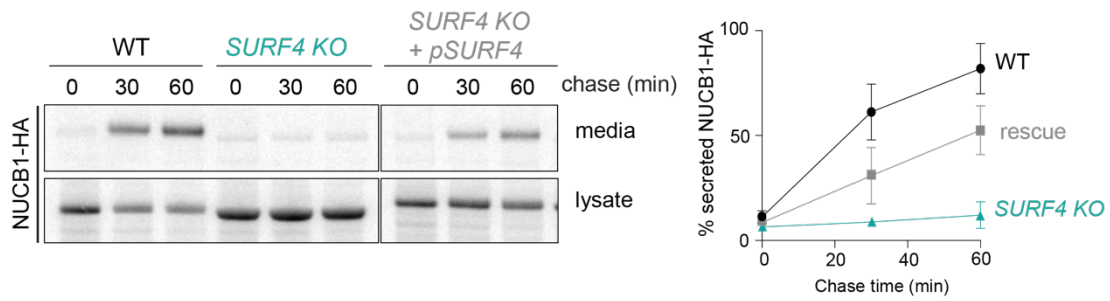

**Figure S5: Rescue of NUCB1 secretion defects in SURF4 KO cells.** NUCB1-HA secretion was examined by pulse-chase in WT, *SURF4 KO*, and *SURF4 KO* cells complemented with the pFLAG-SURF4 plasmid. NUCB1-HA was immunoprecipitated with  $\alpha$ -HA antibodies from lysates and the conditioned media at the indicated times and detected by SDS-PAGE and autoradiography.

**Figure S6**

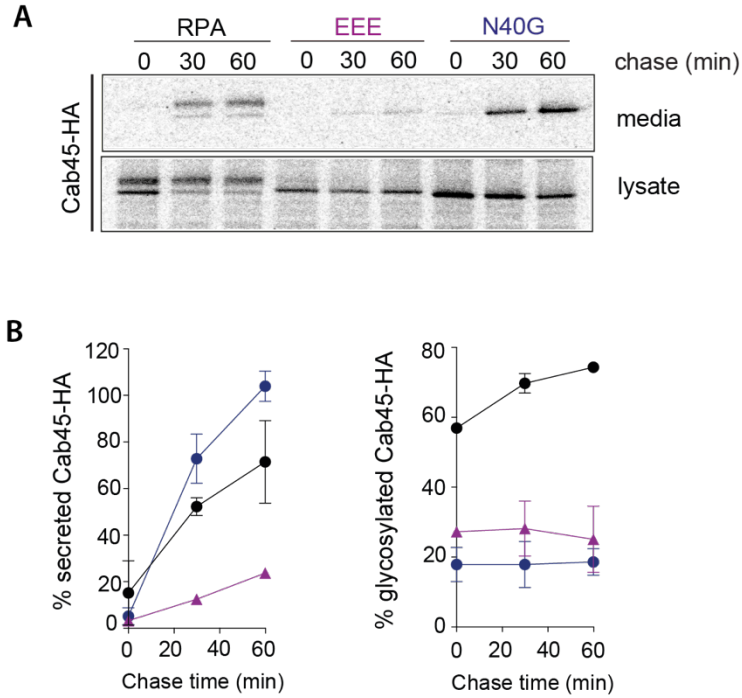

**Figure S6: Glycosylation defects do not influence Cab45 secretion. A)** Cab45-HA secretion was examined by pulse-chase in cells expressing WT (RPA), ER-ESCAPE mutant (EEE) and glycosylation mutant (N40G) variants. Cab45-HA was immunoprecipitated with  $\alpha$ -HA antibodies from lysates and the conditioned media at the indicated times and detected by SDS-PAGE and autoradiography. **(B)** Percentage secretion into the media was quantified by phosphorimage analysis. Percentage of glycosylation was quantified as [glycosylated signal / [total protein (glycosylated + unglycosylated)]. Plots show the mean  $\pm$  SD of three independent experiments.



**Figure S7**

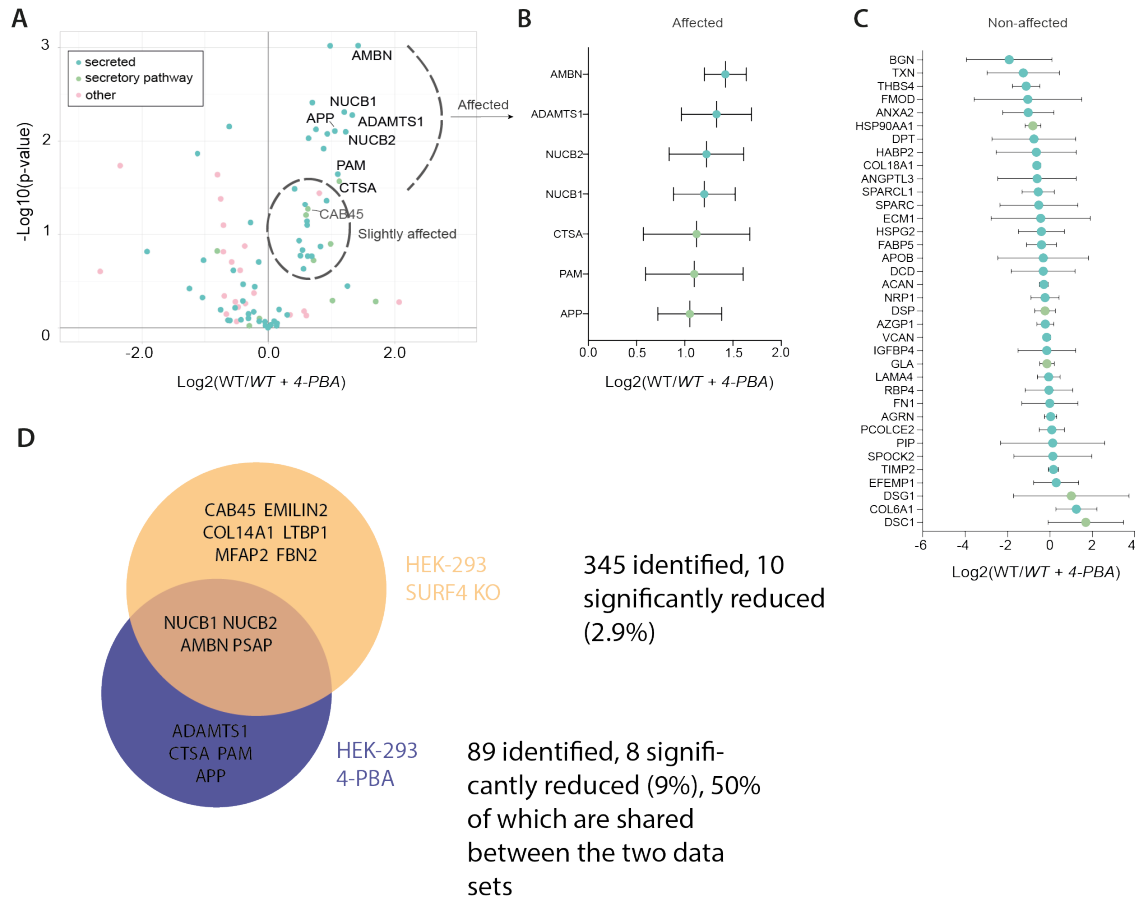

**Figure S7: Proteomic analysis of secretomes from 4-PBA treated cells (A)** Volcano plot showing changes in protein secretion upon 4-PBA treatment in HEK-293 TREx cells. Proteins were considered affected if Log<sub>2</sub> SILAC ratio was >1 and p<0.05 **(B)** Bar graph showing proteins with significantly decreased secretion upon 4-PBA treatment. **(C)** Bar graph showing proteins whose secretion was not significantly affected by 4-PBA treatment. **(D)** Venn diagram showing overlap between SURF4 KO and 4-PBA treated samples. Total proteome pool in each sample is also indicated.

## Figure S8

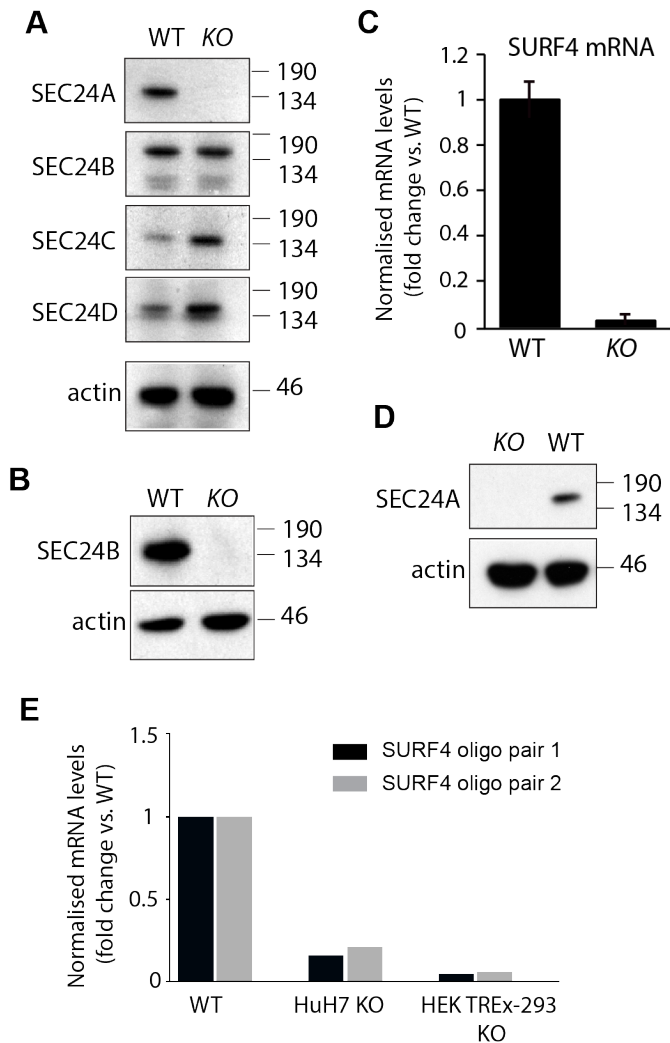

**Figure S8: Validation of KO cell lines** (A) Western blot analysis of *SEC24A* KO CRISPR/Cas9 edited HEK-293 cells. Stability of Sec24 paralogs was analysed by immunoblotting cell lysates prepared from equal numbers of cells with specific antibodies ( $\alpha$ -SEC24A,  $\alpha$ -SEC24B,  $\alpha$ -SEC24C and  $\alpha$ -SEC24D) in WT and *SEC24A* KO cell line.  $\alpha$ -actin was used as loading control. (B) Western blot analysis of *SEC24B* KO CRISPR/Cas9 edited HEK-293 cells. The presence of Sec24B was analysed by immunoblotting cell lysates prepared from equal numbers of cells with  $\alpha$ -SEC24B antibodies.  $\alpha$ -actin was used as loading control. (C) SURF4 mRNA expression in *SURF4* KO CRISPR/Cas9 edited HEK-293 cells. Values are presented as mean  $\pm$  SD of  $n = 3$  independent experiments. (D) SURF4 mRNA expression in *SURF4* KO CRISPR/Cas9 edited HuH7 cells. Values are presented as mean  $\pm$  SD of  $n = 3$  independent experiments.

**Table S1.** Plasmids used in this study.

| <b>Plasmid</b>          | <b>Description</b>                           | <b>Source</b>          |
|-------------------------|----------------------------------------------|------------------------|
| pPCSK9-V5               | pcDNA5-FRT-TO-PCSK9-V5                       | Genescript             |
| pPCSK9-EEE-V5           | pcDNA5-FRT-TO-PCSK9 (I154E, P155E, W156E)-V5 | This study             |
| pFLAG-Cp                | pIRESpuro2b-ssHA-FLAG-Cp                     | This study             |
| pHA-Cp                  | pIRESpuro2b-ssHA-HA-Cp                       | Thor et al., 2009      |
| pLgBiT-SURF4            | pcDNA3.1-LgBiT-linker-SURF4                  | This study             |
| pHaloTag-SmBiT          | pcDNA3.1-HaloTag-linker-SmBiT                | This study             |
| pSmBiT-SEC24A           | pcDNA3.1-SmBiT-linker-SEC24A                 | This study             |
| pSmBiT-SEC24A V748A     | pcDNA3.1-SmBiT-linker-SEC24A V748A           | This study             |
| pSmBiT-SEC24A R750,752A | pcDNA3.1-SmBiT-linker-SEC24A R750,752A       | This study             |
| pSmBiT-SEC24A Y437A     | pcDNA3.1-SmBiT-linker-SEC24A Y437A           | This study             |
| pSmBiT-SEC24A Y496A     | pcDNA3.1-SmBiT-linker-SEC24A Y496A           | This study             |
| pSmBiT-SEC24A R541A     | pcDNA3.1-SmBiT-linker-SEC24A R541A           | This study             |
| pSmBiT-SEC24A K813A     | pcDNA3.1-SmBiT-linker-SEC24A K813A           | This study             |
| pNUCB1-HA               | pcDNA3.1-NUCB1-HA                            | Genescript             |
| pNUCB1-EEE-HA           | pcDNA3.1-NUCB1(V27E, P28E, L29E)-HA          | This study             |
| pCab45-HA               | pLPCX-Cab45-HA                               | von Blume et al., 2012 |
| pCab45-EEE-HA           | pLPCX-Cab45 (R37E, P38E, A39E)-HA            | This study             |
| pCab45-N40G             | pLPCX-Cab45 (N40G)-HA                        | This study             |
| pFLAG-SURF4             | pCDNA3.1-SURF4                               | Genescript             |

**Dataset S1 (separate file).** Mass spectrometry data of secreted proteome from HEK293 cells.

**Dataset S2 (separate file).** Mass spectrometry data of secreted proteome from HuH7 cells.

**Dataset S3 (separate file).** Mass spectrometry data of secreted proteome from HEK293 cells treated with 4-PBA for 4 hours.
